# Supplementary material for: Antioxidant Effect of Moroccan Pomegranate (Punica granatum L. Sefri Variety) Extracts Rich in Punicalagin against the Oxidative Stress Process
Source: MDPI journal article supplement (doi:10.3390/foods10092219), 2021-09-18
Supplement: s1 [file s1]

**Table S1.** Regression equations, linearity range, r, LOD and LOQ of all analytes.

|                      | Regression equation | linearity range (mg/mL) | r      | LOD (mg/mL) | LOQ (mg/mL) |
|----------------------|---------------------|-------------------------|--------|-------------|-------------|
| <b>α Punicalagin</b> | Y = 1350.8x - 82435 | 0.1 - 1                 | 0.9965 | 0.0985      | 0.0325      |
| <b>β Punicalagin</b> | Y = 1445.2x - 43542 | 0.1 - 1                 | 0.9995 | 0.0403      | 0.122       |
| <b>Gallic acid</b>   | Y = 14918x - 20485  | 0.06 – 0.3              | 0.9993 | 0.0133      | 0.0403      |
| <b>Ellagic acid</b>  | Y = 12135x - 785971 | 0.06 – 0.3              | 0.985  | 0.0673      | 0.204       |

**Table S2.** Comparative evaluation of polyphenolic, flavonoid and anthocyanin content of peels and aril extracts of Sefri and various pomegranate (*Punica granatum*) cultivars.

| Plant Extract                  | Polyphenols (mg GAE/g dw) | Flavonoids (mg QE/g dw) | Total Anthocyanin (mg cy-3-glu/100g dw) | α-Punicalagin (mg/g dw) | β-Punicalagin (mg/g dw) | Gallic Acid (mg/g dw) | Ellagic Acid (mg/g dw) |
|--------------------------------|---------------------------|-------------------------|-----------------------------------------|-------------------------|-------------------------|-----------------------|------------------------|
| <b>Moroccan Sefri cultivar</b> |                           |                         |                                         |                         |                         |                       |                        |
| PPPE                           | 283.86 ± 17.89            | 185.37 ± 3.05           | 102.97 ± 9.19. ns                       | 148.95 ± 2.43           | 302.38 ± 7.26           | 5.87 ± 0.08           | 18.85 ± 0.41           |
| PAPE                           | 166.90 ± 18.10            | 57.43 ± 0.41            | 81.26 ± 18.39                           | 40.40 ± 2.67            | 3.03 ± 0.44             | 3.88 ± 0.04           | 14.43 ± 0.21           |
| <b>Tunisian Cultivar</b>       |                           |                         |                                         |                         |                         |                       | [1. 2]                 |
| PPPE                           | 87.33 – 109.79            | 44.83 – 56.46           | 63.76 – 80.90                           | --                      | --                      | 1.09 - 1.31           | 0.34 – 0.36            |
| PAPE                           | 10.59 – 13.70             | 4.11- 5.75              | 28.15 – 48.27                           | --                      | --                      | 0.137 – 0.205         | 0.22 – 0.24            |
| <b>Iranian cultivar</b>        |                           |                         |                                         |                         |                         |                       | [3. 4]                 |
| PPPE                           | 98.24 - 250.13            | 18.61 - 36.4            | 3.95 – 29.52 (mg Cat/g)                 | --                      | --                      | --                    | --                     |
| PAPE                           | 11.62 – 21.03             | 0.84 – 2.14             | 1.6 – 3.89 (mg Cat/g)                   | --                      | --                      | --                    | --                     |
| <b>Turkish cultivar</b>        |                           |                         |                                         |                         |                         |                       | [5. 6]                 |
| PPPE                           | 126.11 - 212.48           | 9.44 - 20.52            | 20 – 800 mg/L                           | --                      | --                      | --                    | --                     |
| PAPE                           | 4.22 – 9.20               | 1.97 – 3.97             | 20 – 350 mg/L                           | -                       | --                      | --                    | --                     |
| <b>Italian cultivar</b>        |                           |                         |                                         |                         |                         |                       | [7-10]                 |
| PPPE                           | 237.7 – 612.7             | 0.471 – 0.881 mmol RE/g | 28.45 - 32.68 μmolC3G/g                 | 1.3 – 183.8             | 0.3 – 325.1             | --                    | 0.6 – 40.1             |
| PAPE                           | 28.39 – 103.01 mgGAE/L    | 29.44 – 75.15 mg/L      | 58.49 – 198.06 mg CE/L                  | --                      | - 165.26                | 4.27 -53.2 mg/L       | 11.22 – 41.40 mg/L     |
| <b>Spanish cultivar</b>        |                           |                         |                                         |                         |                         |                       | [11-14]                |
| PPPE                           | - 161                     | 6.32 – 13.27 mg RE/g    | - 53.52                                 | 113 - 148               | 74 - 107                | --                    | 13 -16.7               |
| PAPE                           | 141.29 – 172.5            | 4.77 – 18.9 mgQE/L      | 34.2 – 655.8 mg/L                       | 0.3-10.3 mg/L           | 1-31.4 mg/L             | --                    | 4.9-152.8 mg/L         |
